# Supplementary material for: η2-Sulfenamido complexes of uranium †
Source: Royal Society of Chemistry journal article supplement (doi:10.1039/b000304m), 2000-01-01
Supplement: b000304m.doc [file b000304m.doc]

**Figure 1(a).** Superimposition of the co-ordination sphere of **1**  and Zr(2-ButNSPh)41

**Figure 2(a).** Superimposition of **2a** and ZrCl(5-C5H5)2(2-ButNSPh)1. X1a and X1b are the centroids of the C5H5 rings.

**Figure 3(a).** Superimposition of **2b** and ZrCl(5-C5H5)2(2-ButNSPh)1. X1a and X1b are the centroids of the C5H5 rings.

Numerical fitting data for paper ref: B000204M

**Table 1(a).**  Compound **1** fitted to analogous zirconium structure as outlined in text of paper.

| Atom | Fitted to | Deviation (Å) |
| --- | --- | --- |
| Zr(1) | U(1) | 0.031 |
| S(1) | S(1) | 0.152 |
| S(2) | S(3) | 0.204 |
| S(3) | S(4) | 0.203 |
| S(4) | S(2) | 0.135 |
| N(1) | N(1) | 0.201 |
| N(2) | N(3) | 0.151 |
| N(3) | N(4) | 0.182 |
| N(4) | N(2) | 0.274 |

**Table 2(a).** Compound **2** fitted to analogous zirconium structure as outlined in text of paper.

| Atom | Fitted to | Deviation (Å) |
| --- | --- | --- |
| U(1) | Zr(1) | 0.070 |
| S(1) | S(1) | 0.073 |
| N(1) | N(1) | 0.015 |
| Cl(1) | Cl(1) | 0.379 |
| X1a | X1b | 0.542 |
| X1a | X1a | 0.340 |

X1a is the centroid of the C5H5 ring C(1)-C(5), X1b that of ring C(11)-C(15).

**Table 3(a).** Compound **3** fitted to analogous zirconium structure as outlined in text of paper.

| Atom | Fitted to | Deviation (Å) |
| --- | --- | --- |
| Zr(1) | U(1) | 0.114 |
| S(1) | S(1) | 0.050 |
| N(1) | N(1) | 0.071 |
| Cl(1) | Br(1) | 0.442 |
| X1a | X1b | 0.540 |
| X1b | X1a | 0.363 |

X1a is the centroid of the C5H5 ring C(1)-C(5), X1b that of ring C(11)-C(15).
